# Supplementary material
Source: PubMed Central journal article supplement (PMC3502196)
Supplement: supp_djs418_jnci_JNCI_12_0210_s01.pdf [file supp_djs418_jnci_JNCI_12_0210_s01.pdf]

## Supplementary Figure 1.

**A**

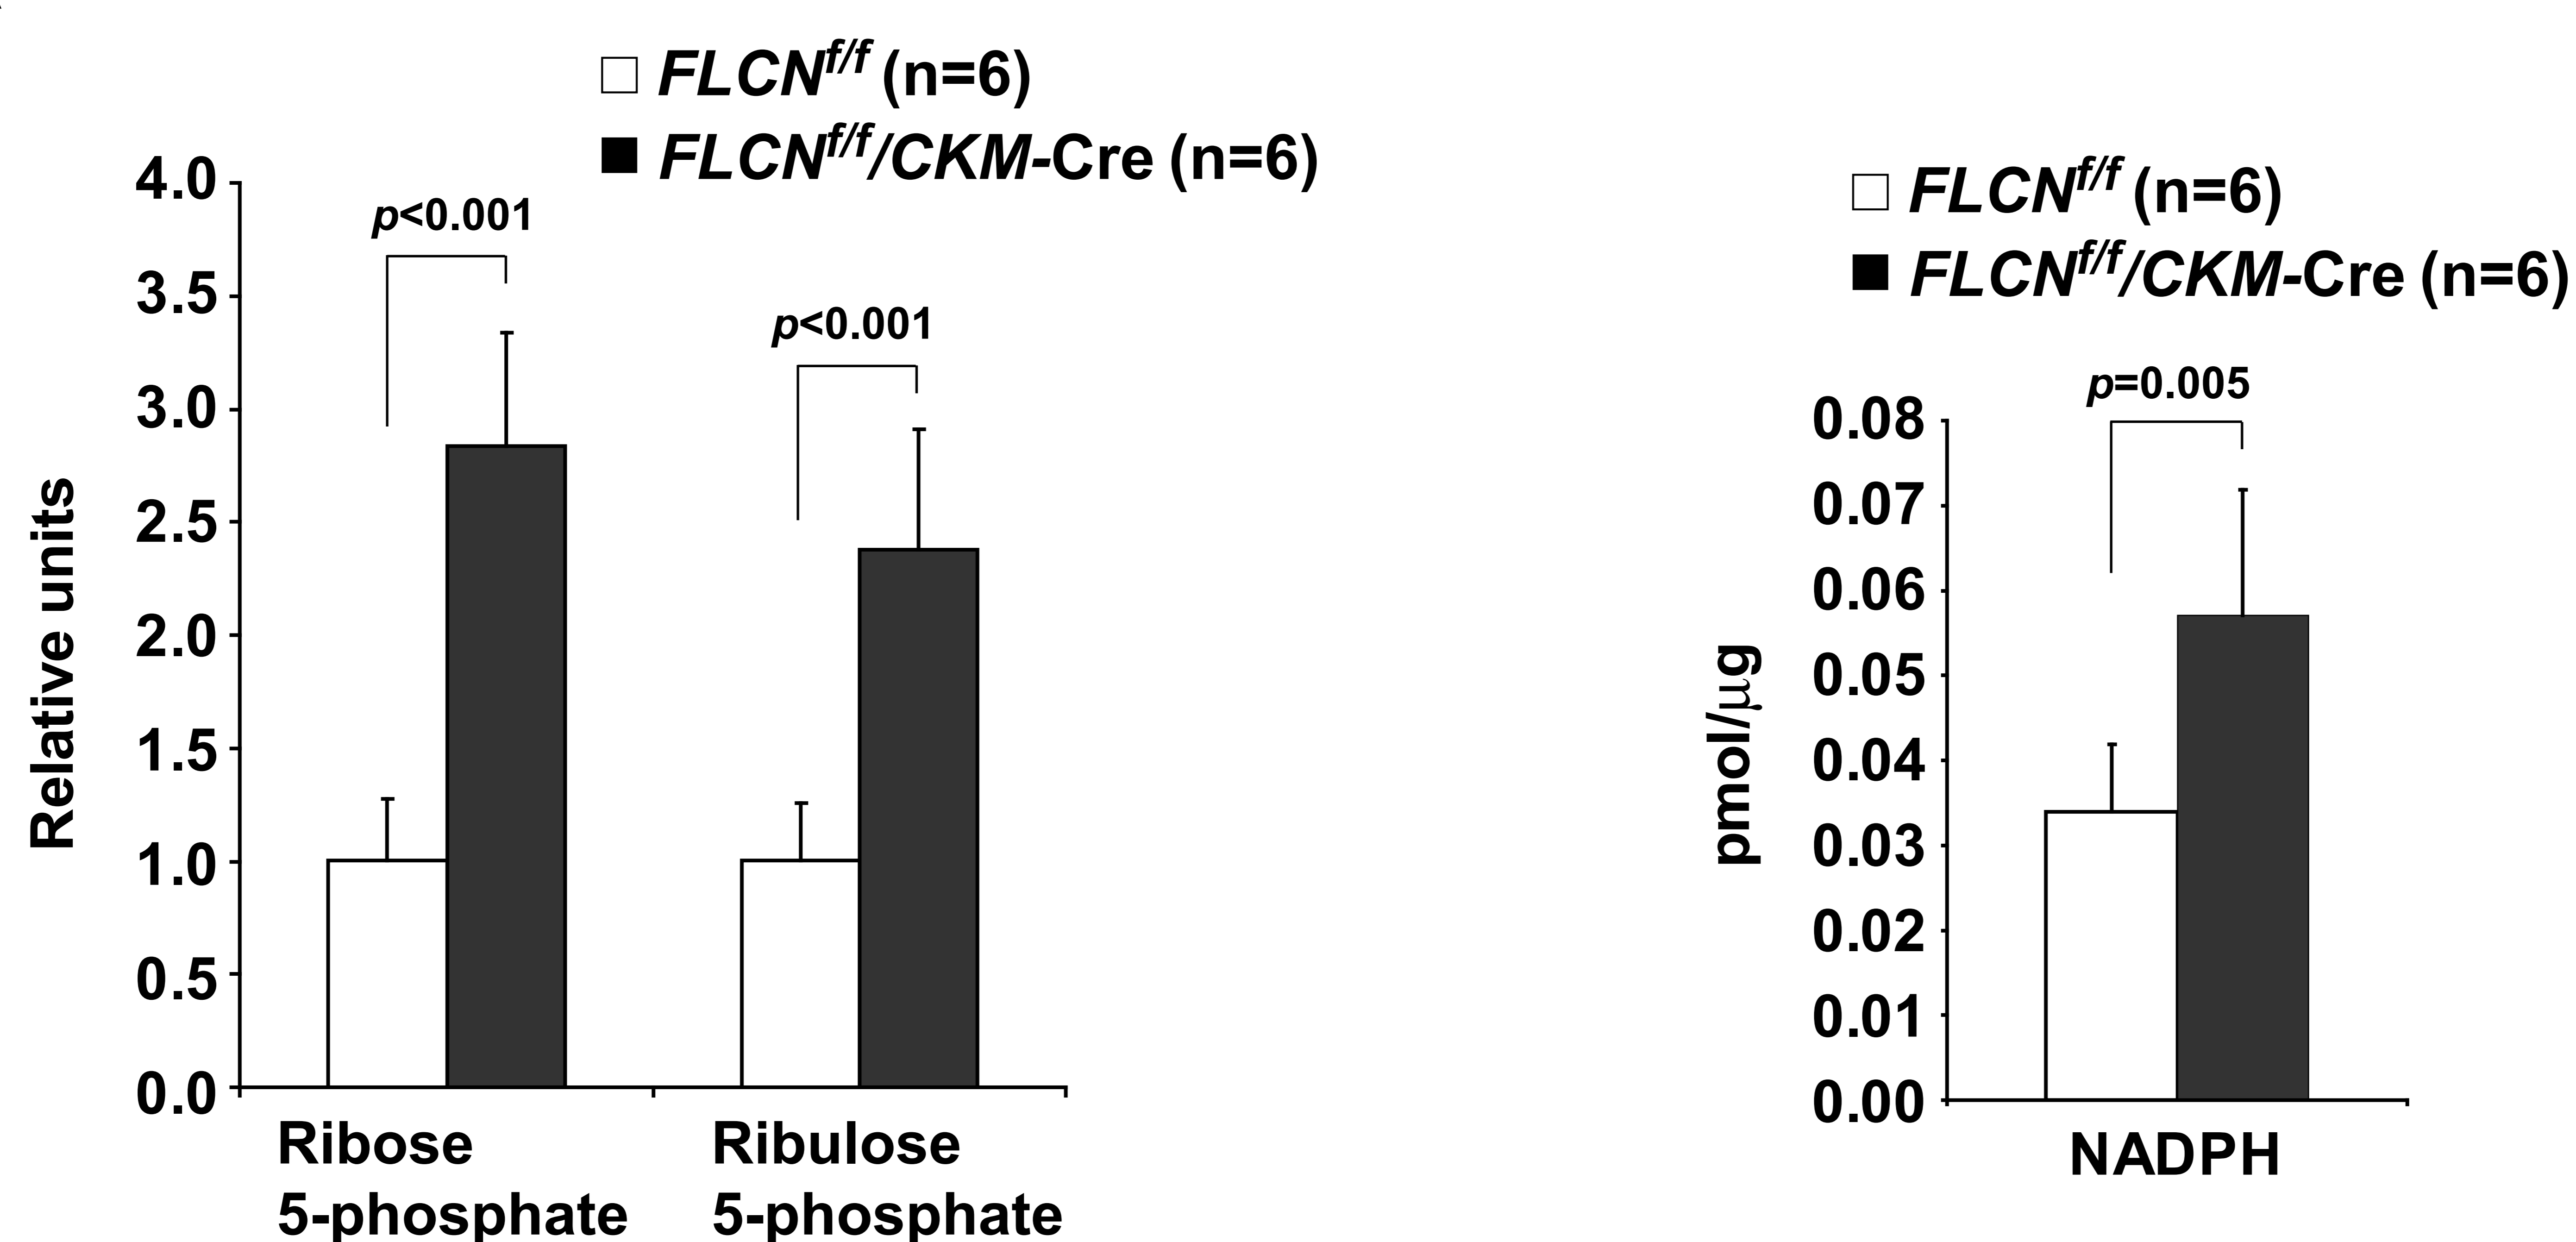

**B**

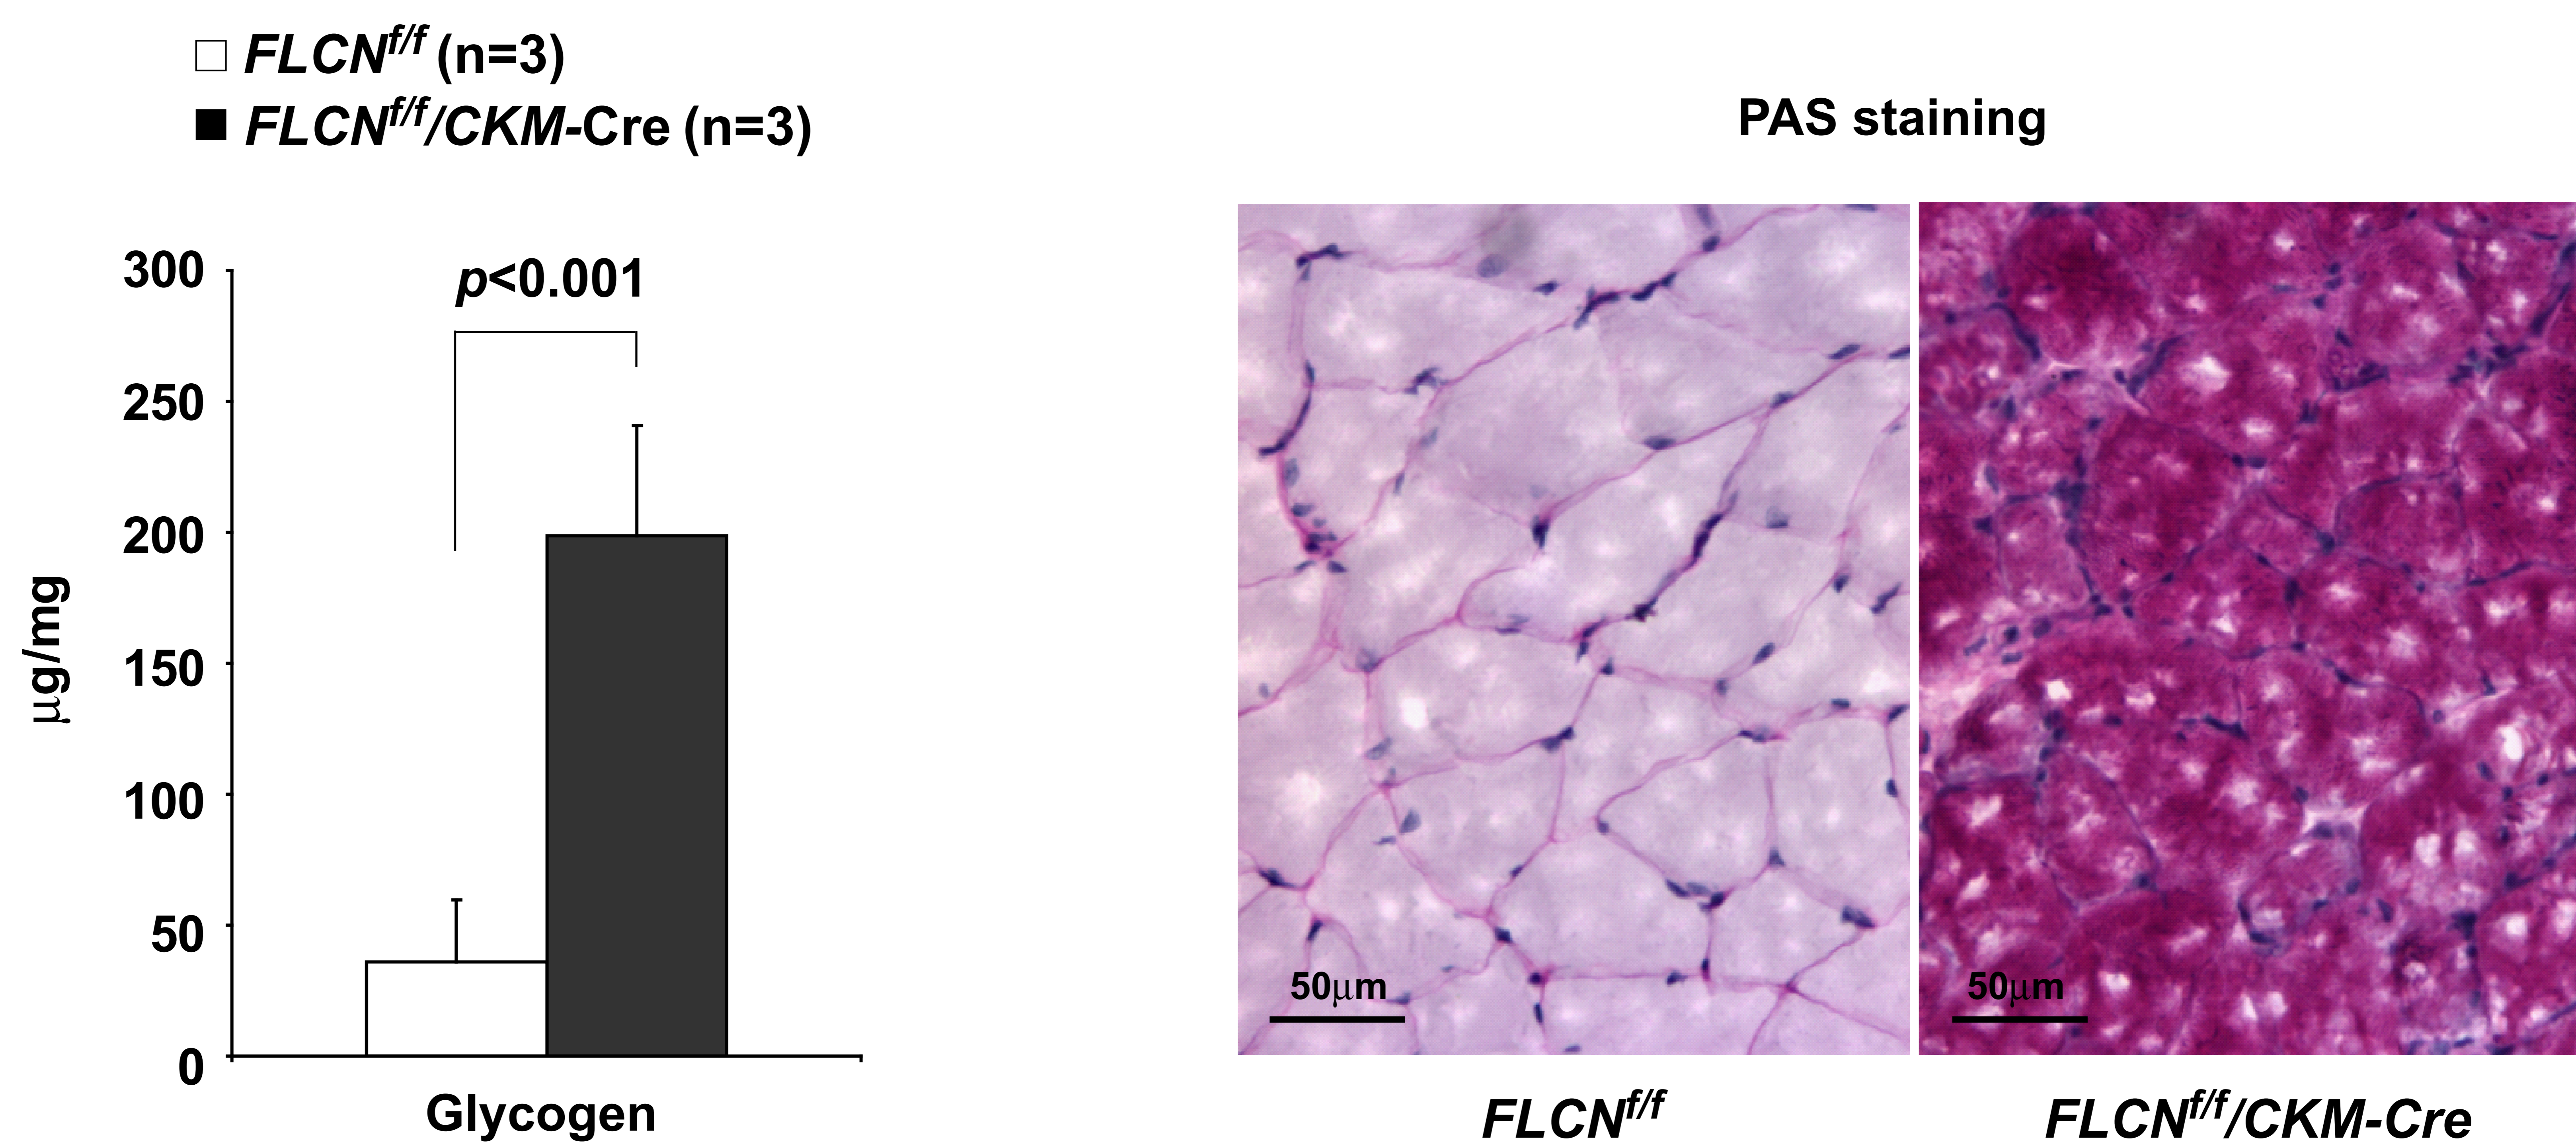

**C**

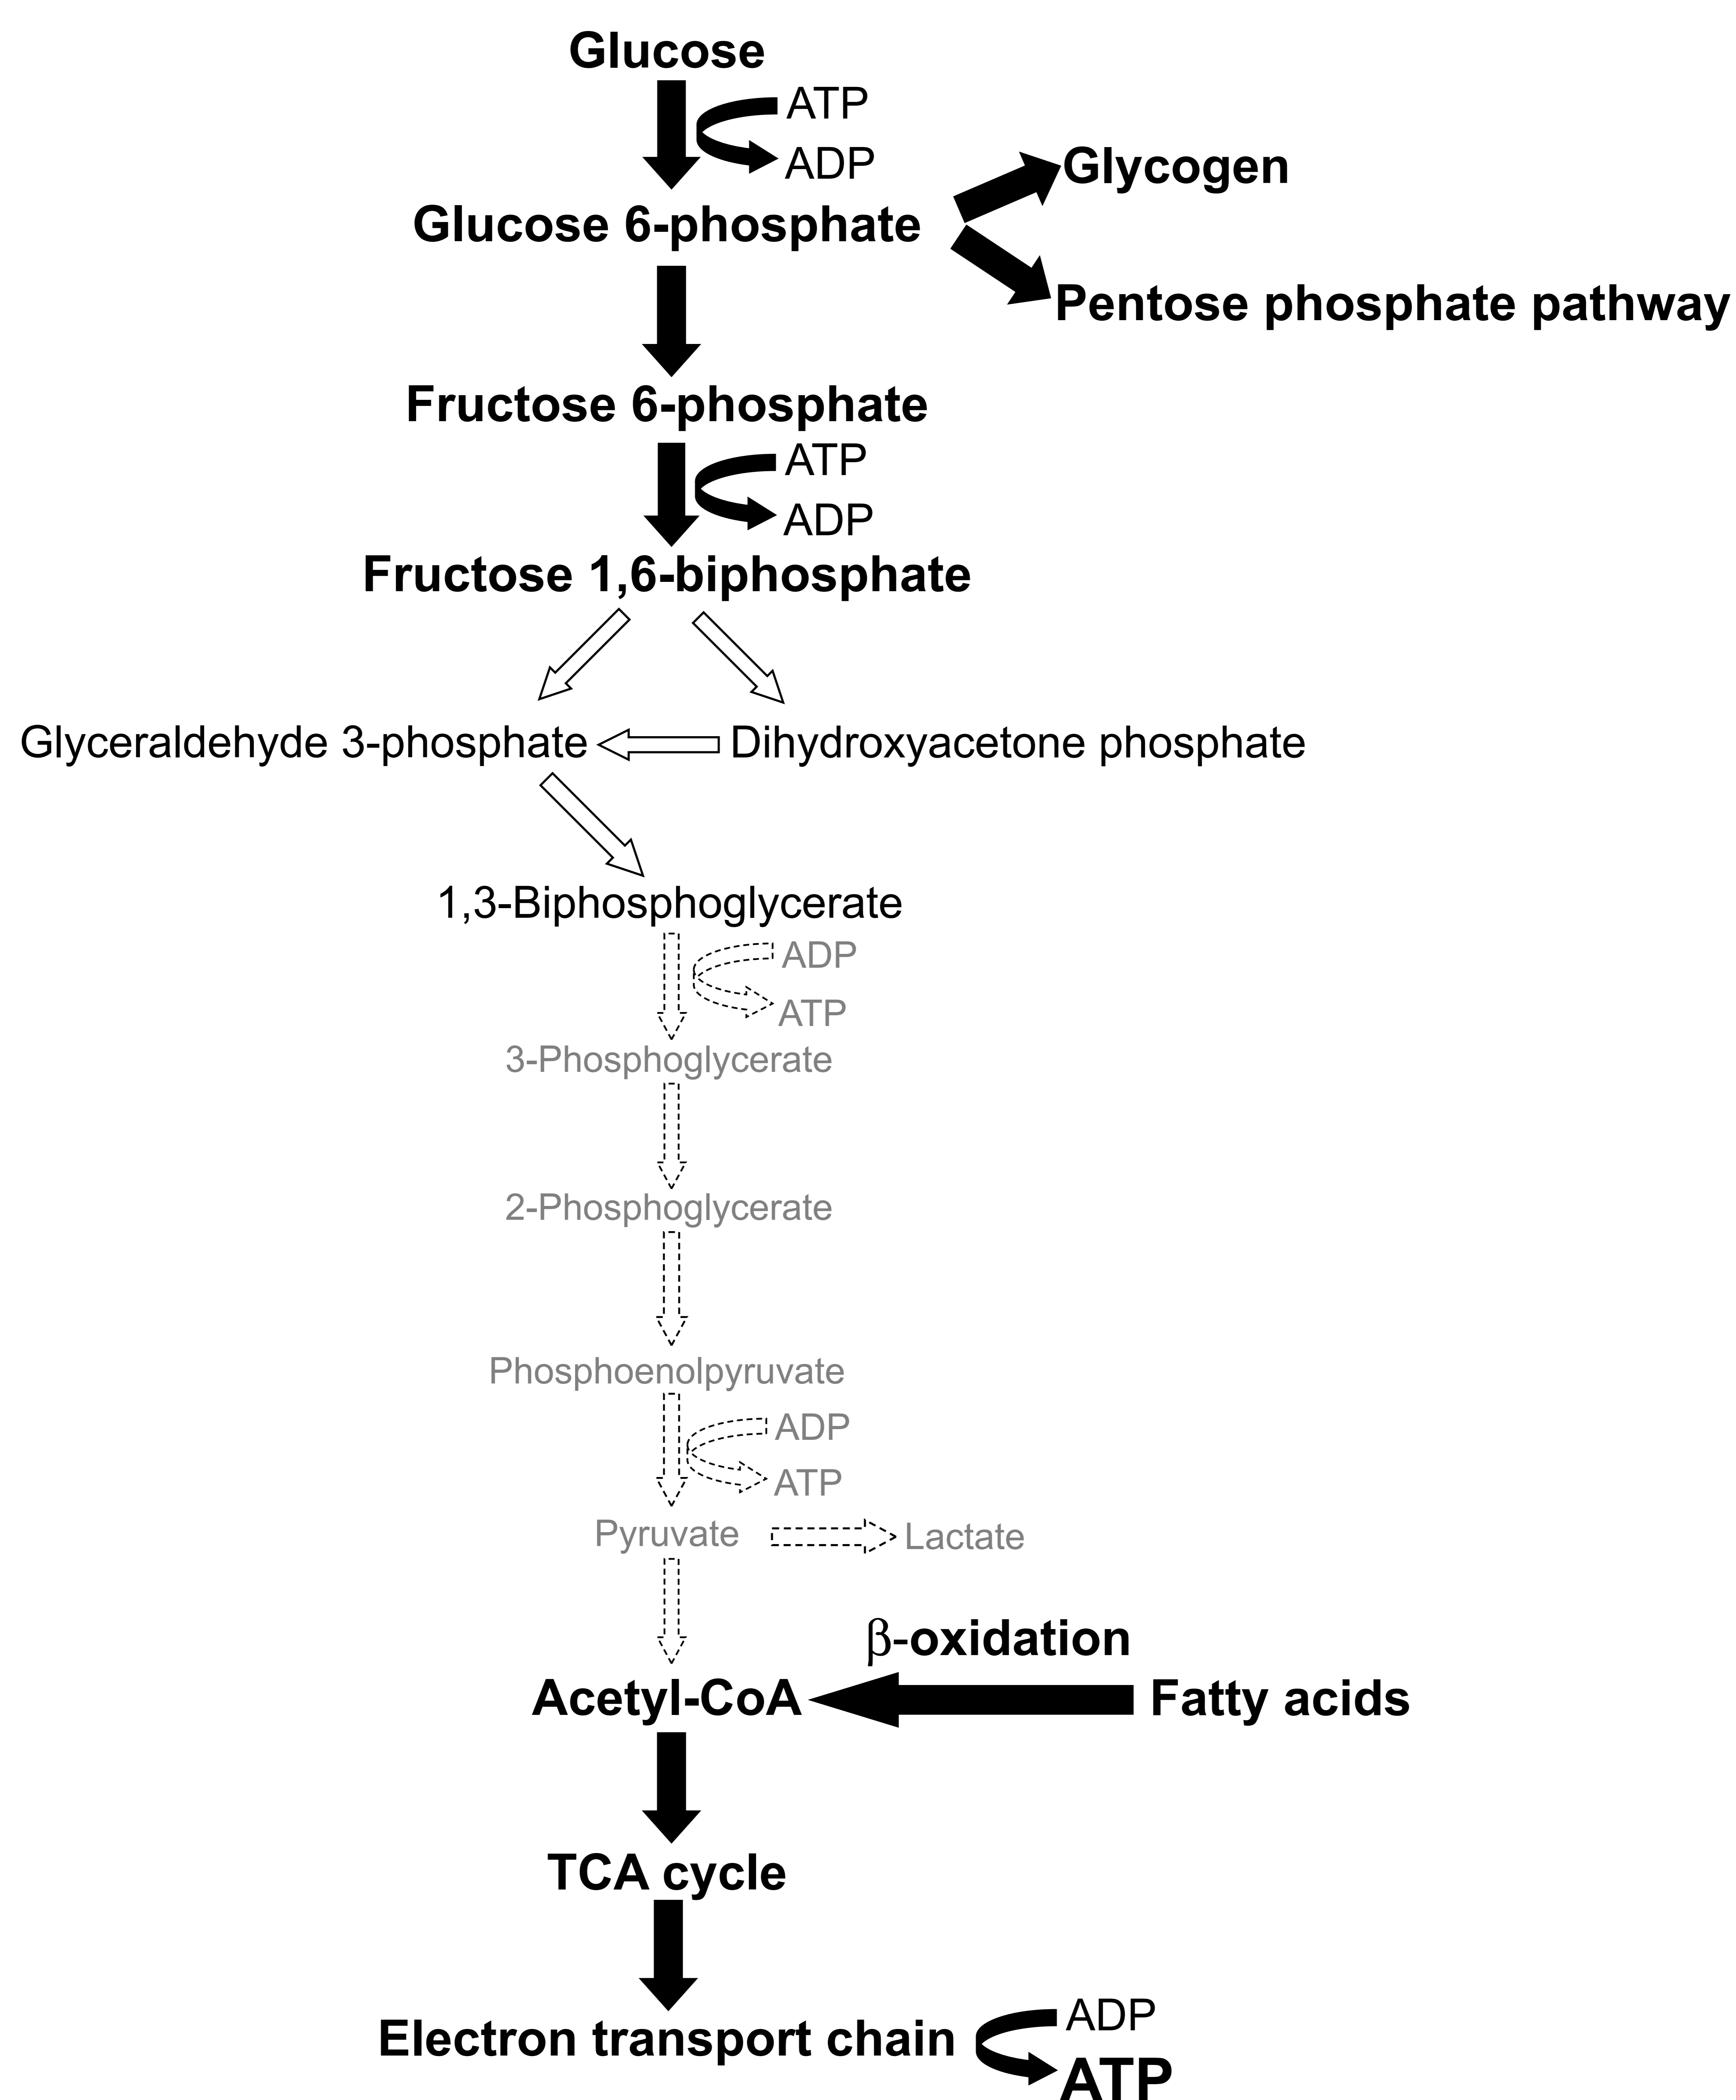

### Figure S1. The glycolytic pathway, pentose phosphate pathway and glycogenesis in *FLCN*-deficient muscle tissues

(A) Metabolite profiling analyses using LC/MS and GC/MS were carried out with extracts from quadriceps muscle, and relative units of metabolites related to pentose phosphate pathway were obtained. Mean  $\pm$  95%CI. Two-sided student's *t*-test. Quadriceps, n=6. (Left panel). NADPH in quadriceps muscle was measured using a commercially available kit (Biovision, Milpitas, CA). Mean  $\pm$  95%CI. Two-sided student's *t*-test. Quadriceps, n=6. (Right panel).

(B) Glycogen in quadriceps muscle was measured using a commercially available kit (Sigma-Aldrich, St. Louis, MO). Mean  $\pm$  95%CI. Student's *t*-test. (Left panel). Quadriceps muscle was stained with PAS staining. Scale bar: 50μm. (Right panel)

(C) Scheme of metabolic pathway in *FLCN*-deficient muscle tissues.
