# Supplementary material
Source: PubMed Central journal article supplement (PMC3502196)
Supplement: supp_djs418_jnci_JNCI_12_0210_s02.pdf [file supp_djs418_jnci_JNCI_12_0210_s02.pdf]

## Supplementary Figure 2.

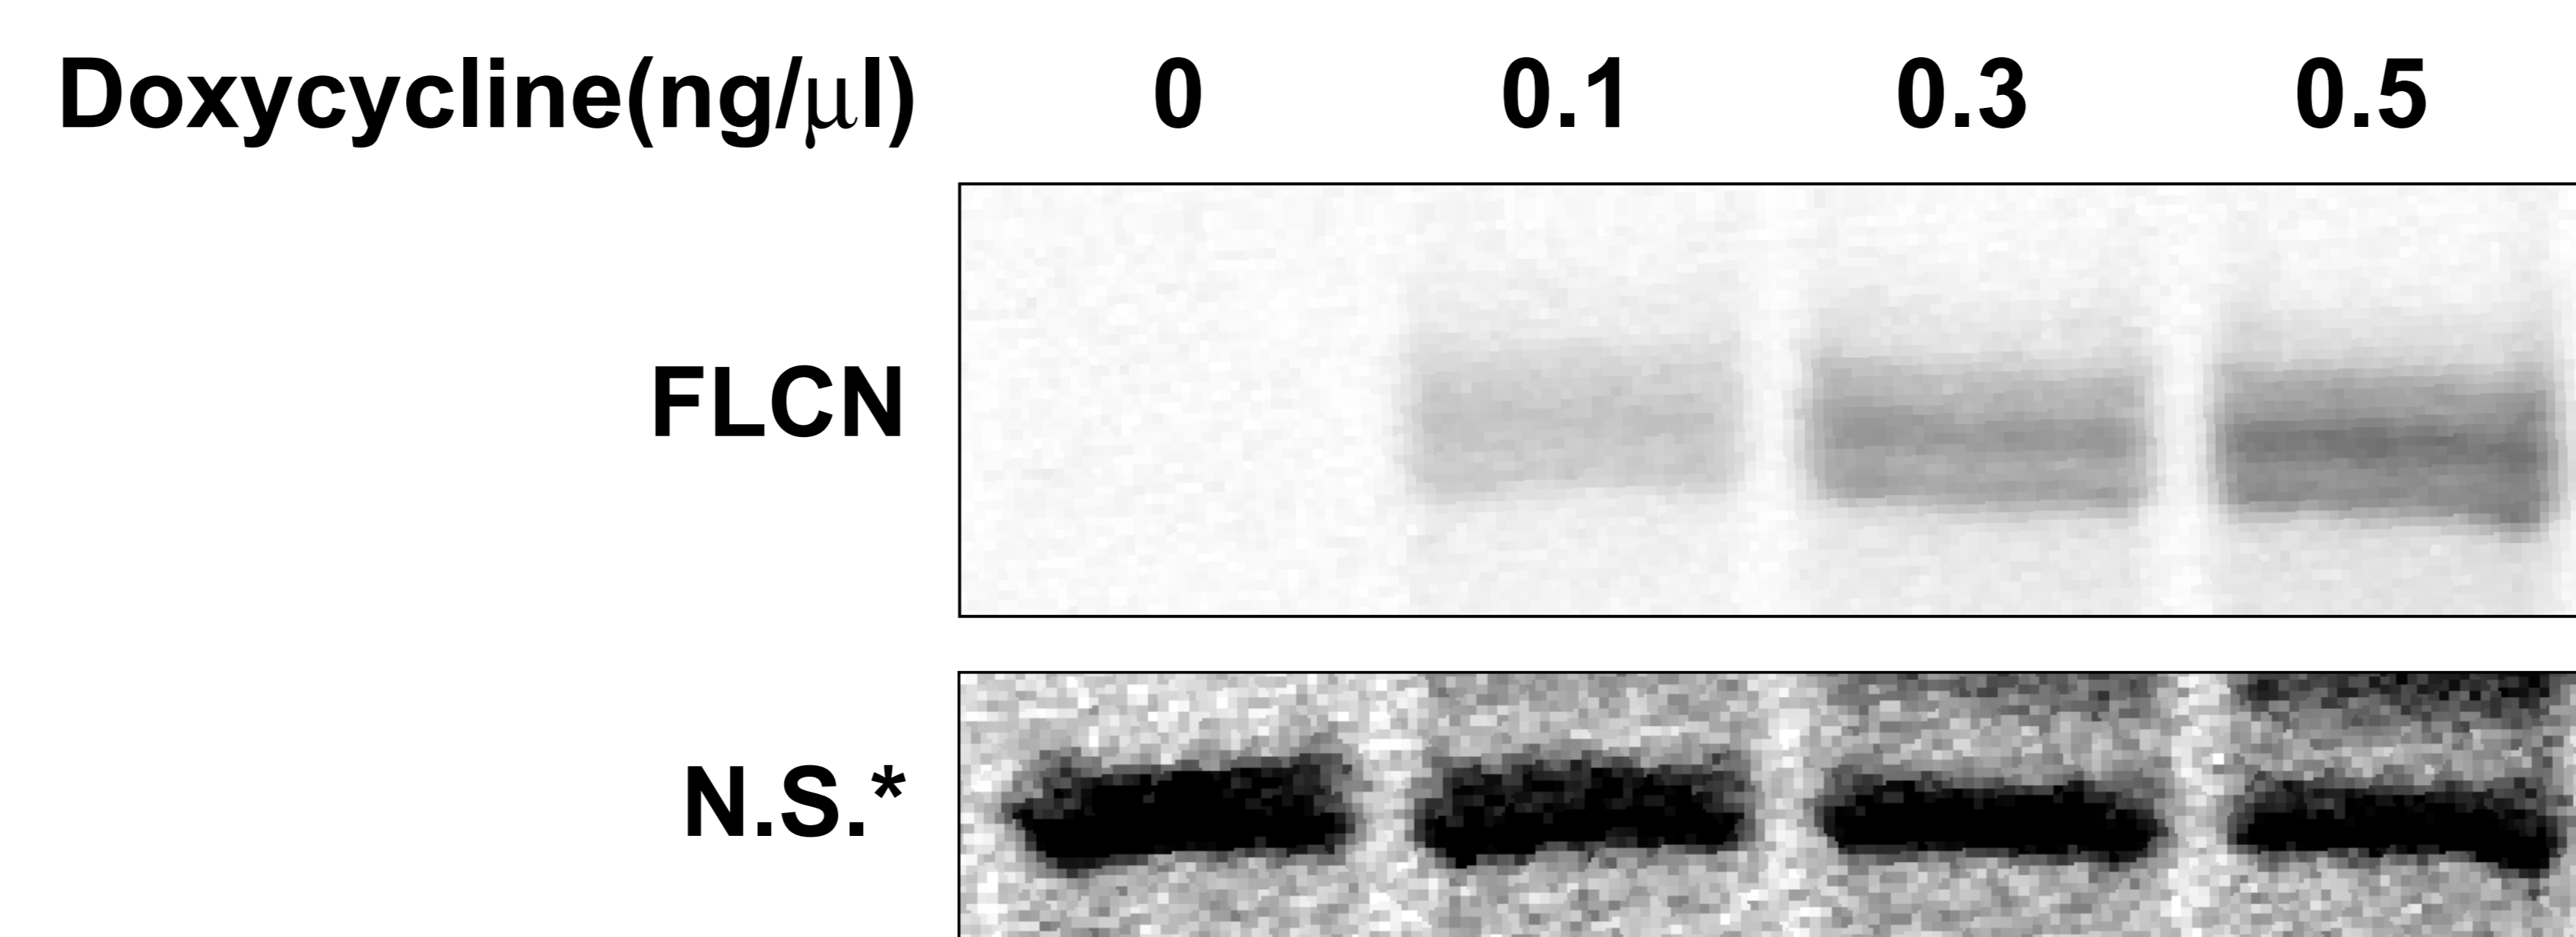

**Figure S2. FLCN expression is restored in *FLCN*-null kidney cancer cell line, UOK257**  
*FLCN*-null UOK257, a cancer cell line originally derived from a renal tumor of a BHD syndrome patient, was reconstituted with wild-type *FLCN* gene expression by two sequential lentiviral transductions using the full length rtTA3(Tet-on) gene (Clontech, Mountain View, CA) and the full length *FLCN* gene under the TRE-tight promoter. Different concentrations of doxycycline were added and cells were harvested 12 hr later. Immunoblotting shows FLCN protein is restored in a docycycline dose-dependent manner. \* Non specific band.
