# Supplementary material
Source: PubMed Central journal article supplement (PMC3502196)
Supplement: supp_djs418_jnci_JNCI_12_0210_s03.pdf [file supp_djs418_jnci_JNCI_12_0210_s03.pdf]

### Supplementary Figure 3.

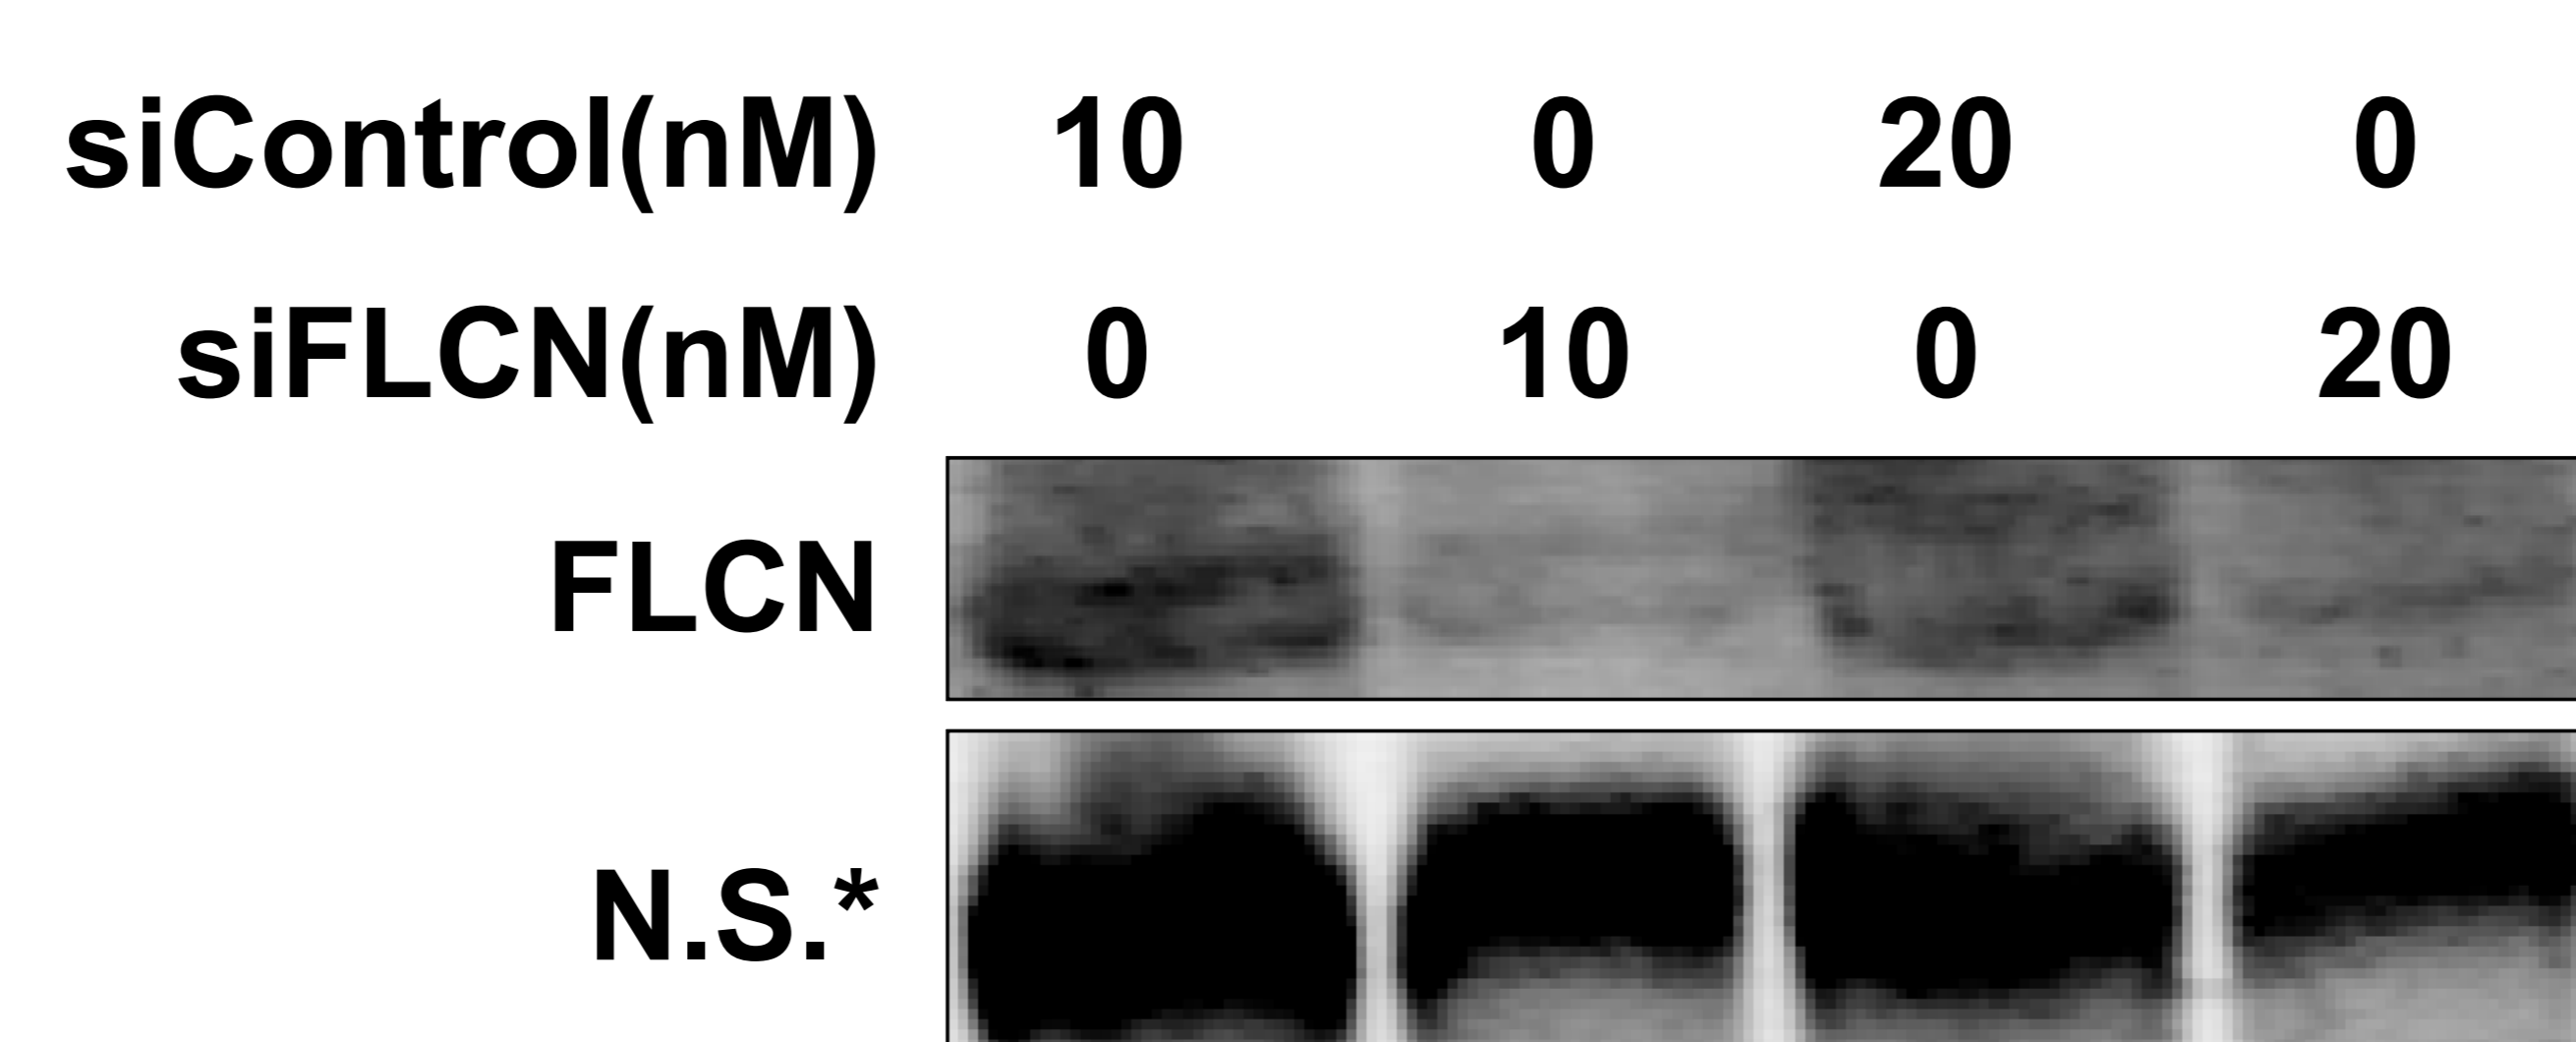

#### Figure S3. Validation of siFLCN efficacy in C2C12 myoblast

C2C12 myoblast cell line was transfected with Stealth siRNA for *FLCN*, MSS278133; UUCAACGCUGAAUGGACCAGGUUC (Invitrogen, Carlsbad, CA) using RNAi Max (Invitrogen) in the presence of 10% horse serum, harvested 48hrs later and immunoblotted with the indicated antibody. \* Non specific band.
