# Supplementary material
Source: PubMed Central journal article supplement (PMC3502196)
Supplement: supp_djs418_jnci_JNCI_12_0210_s04.pdf [file supp_djs418_jnci_JNCI_12_0210_s04.pdf]

**Supplementary Table 1.** Primer sequences used for real-time polymerase chain reaction

| Species | Gene           | Primer  | Sequence                   |
|---------|----------------|---------|----------------------------|
| Mouse   | $\beta$ -actin | Forward | gacatggagaagatctggca       |
|         |                | Reverse | ggtctcaaacatgatctgggt      |
| Mouse   | 36B4           | Forward | gcagacaacgtgggctccaagcagat |
|         |                | Reverse | ggtcctccttggtgaacacgaagccc |
| Mouse   | FLCN           | Forward | gctcctgaaggcatcggtagca     |
|         |                | Reverse | cagcaagcttctcatctggaccag   |
| Mouse   | ATP5g          | Forward | agttgggtggctggatca         |
|         |                | Reverse | gctgctgagagatgggttc        |
| Mouse   | COX5a          | Forward | gggtcacacgagacagatga       |
|         |                | Reverse | ggaaccagatcatagccaaca      |
| Mouse   | Cytochrome C   | Forward | ggaggcaagcataagactgg       |
|         |                | Reverse | tccatcagggtatcctctcc       |
| Mouse   | PDK4           | Forward | atttctgaccgaggaggcgggttc   |
|         |                | Reverse | cagggtgtggagcagtgagtagc    |
| Mouse   | Ndufs8         | Forward | tggcggcaacgtacaagtat       |
|         |                | Reverse | cctcggatgagttctgtcca       |
| Mouse   | UCP3           | Forward | ttcctcctgctctcgctgccttg    |
|         |                | Reverse | gaagttggctctgtgcttgccctc   |
| Mouse   | PPARGC1A       | Forward | atgaccctcctcacaccaaaccacag |
|         |                | Reverse | cttgagcatgttgcgactgcggtgtg |
| Mouse   | PPARGC1B       | Forward | cgctccaggagactgaatccag     |
|         |                | Reverse | cttgactactgtctgtgaggc      |
| Mouse   | PPRC1          | Forward | aatacctggccgaatgactc       |
|         |                | Reverse | agttgtcaccttggacacga       |
| Mouse   | Gabpa          | Forward | cccagctgaatgttaagcc        |
|         |                | Reverse | caaacaagcttcggtctgga       |
| Mouse   | NRF1           | Forward | gaactgccaaccacagtcac       |
|         |                | Reverse | ttgttccacctctccatca        |
| Mouse   | VEGFb          | Forward | acaccaagtccgaatgcagatcctc  |
|         |                | Reverse | ggctcgcattcacattggctgtgt   |
| Mouse   | ANGPT2         | Forward | aagtagcatcagccaaccaggaagtg |
|         |                | Reverse | gaaggaccacatgcgtcaaaccacca |
| Mouse   | ERdj4          | Forward | accaccaatcgacacacagtacagac |
|         |                | Reverse | cctcttcgtgagtgacagtcctgc   |
| Mouse   | CHOP           | Forward | agcaggagaacgagcggaaagtg    |
|         |                | Reverse | caggcgctcgattcctgcttgag    |
| Human   | $\beta$ -actin | Forward | gcaaagacctgtacgccaac       |
|         |                | Reverse | agtactgcgctcaggagga        |
| Human   | FLCN           | Forward | cgaccxaaagaggacacacagaagc  |
|         |                | Reverse | accgtggacatgaggtgtgactgtag |
| Human   | Cytochrome C   | Forward | gtgatgttgagaaaggcaagaag    |
|         |                | Reverse | ctgtctccgccaagaag          |
| Human   | PDK4           | Forward | agatttcagacagaggaggtggttc  |
|         |                | Reverse | caggcgttggcagtgaggatg      |
| Human   | COX5a          | Forward | gtggctatccagtcagttcgtg     |
|         |                | Reverse | gttaccagcggagcatcaaactcc   |
| Human   | PPARGC1A       | Forward | gcaaaccacaactttatctctc     |
|         |                | Reverse | cacacttaaggtgcgttcaatagtc  |
