# Supplementary material
Source: PubMed Central journal article supplement (PMC3502196)
Supplement: supp_djs418_jnci_JNCI_12_0210_s05.pdf [file supp_djs418_jnci_JNCI_12_0210_s05.pdf]

**Supplementary Table 2.** Metabolites in glycolytic pathway of *FLCN*-deficient quadriceps muscle\*

| Metabolite               | KO (n=6)<br>/ WT (n=6) | P †    |
|--------------------------|------------------------|--------|
| Glucose                  | 1.260                  | 0.0004 |
| Glucose 6-phosphate      | 4.581                  | 0.0007 |
| Fructose 6-phosphate     | 4.687                  | 0.0006 |
| Fructose 1,6-biphosphate | 6.666                  | 0.0001 |
| 3-Phosphoglycerate       | 0.066                  | 0.0032 |
| 2-Phosphoglycerate       | 0.059                  | 0.0028 |
| Phosphoenolpyruvate      | 0.033                  | 0.0049 |
| Pyruvate                 | 0.625                  | 0.0133 |
| Lactate                  | 0.920                  | 0.0159 |

\*Metabolite profiling analyses using LC/MS and GC/MS were carried out with extracts from quadriceps muscle, and KO (*FLCN<sup>ff</sup>/CKM-Cre*) / WT (*FLCN<sup>ff</sup>*) ratios of metabolites related to glycolytic pathway were obtained. Glucose, glucose 6-phosphate, fructose 6-phosphate and fructose 1,6-biphosphate are metabolites in the early glycolysis pathway, and 3-phosphoglycerate, 2-phosphoglycerate, phosphoenolpyruvate, pyruvate and lactate are metabolites in the late, three-carbon portion of the glycolysis pathway. KO = knockout. WT = wild-type.

† Student's *t*-test (two-sided).
